# Supplementary material for: Calcite seed-assisted microbial induced carbonate precipitation (MICP) and its potential in biocementation
Source: bioRxiv or medRxiv preprint supplement (doi:10.1101/2020.07.17.206516), 2020-09-09
Supplement: Supplementary file [file media-1.pdf]

# **Supplementary material: Calcite seed-assisted microbial induced carbonate precipitation (MICP) and its potential in biocementation**

Jennifer Zehner,<sup>\*,†</sup> Anja Røyne,<sup>‡</sup> and Pawel Sikorski<sup>†</sup>

<sup>†</sup>*Department of Physics, Norwegian University of Science and Technology, Trondheim*

<sup>‡</sup>*The Njord Centre, Department of Physics, University of Oslo, Oslo*

E-mail: jennifer.s.zehner@ntnu.no

## **Methods**

### **Scanning electron microscopy**

The shape and the size of the fabricated calcite seeds was investigated with a scanning electron microscope (FEI APREO) (SEM). The dried calcite seeds were attached to a SEM stub with carbon tape and sputter coated (Cressington 208HR) with 10 nm platinum/palladium (80/20). SEM images were taken with an accelerating voltage of 2 kV.

## Supplementary Data

Table S1: Dilution of original bacteria cultures. The original culture with growth medium was centrifuged, washed and re-suspended in 0.01 M PBS. The re-suspended bacteria cultures without growth medium were dilute to the final dilutions, which were used for the experiments.

| Sample name | Culture with growth medium |        | Culture without growth medium |             |                     |
|-------------|----------------------------|--------|-------------------------------|-------------|---------------------|
|             | Amount culture             | PBS    | Amount culture                | PBS         | OD <sub>600nm</sub> |
| D1-C1       | 4 mL                       | 4 mL   | 1000 $\mu$ L                  | 0 $\mu$ L   | 1.40                |
| D2-C1       | 4 mL                       | 4 mL   | 750 $\mu$ L                   | 250 $\mu$ L | 1.30                |
| D3-C1       | 4 mL                       | 4 mL   | 500 $\mu$ L                   | 500 $\mu$ L | 1.11                |
| D4-C1       | 4 mL                       | 4 mL   | 200 $\mu$ L                   | 800 $\mu$ L | 0.64                |
| D1-C2       | 1 mL                       | 1.5 mL | 1000 $\mu$ L                  | 0 $\mu$ L   | 0.96                |
| D2-C2       | 3 mL                       | 3.5 mL | 1000 $\mu$ L                  | 0 $\mu$ L   | 0.88                |
| D1-C3       | 3 mL                       | 3.5 mL | 1000 $\mu$ L                  | 0 $\mu$ L   | 0.89                |

Table S2: Starting pH value of the crystallization solution for samples with and without calcite seeds present before adding the bacteria culture to the crystallization solution.

| Bacteria sample | pH unseeded | pH seeded |
|-----------------|-------------|-----------|
| D1-C1           | 5.3         | 6.1       |
| D2-C1           | 5.3         | 6.1       |
| D3-C1           | 5.3         | 6.3       |
| D4-C1           | 5.4         | 6.1       |

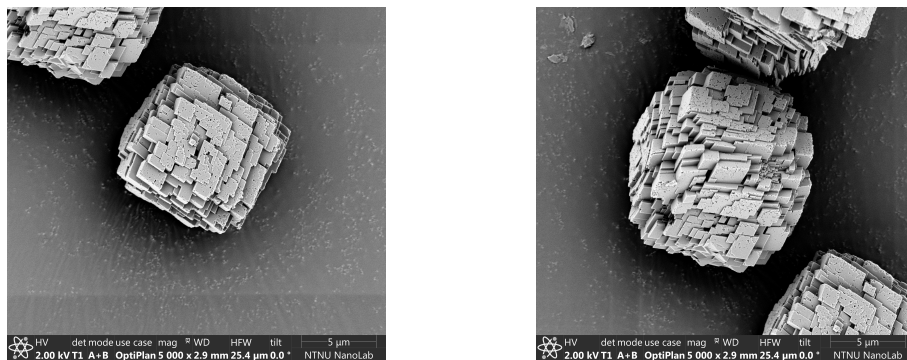

Figure S1: SEM images of calcite seeds.

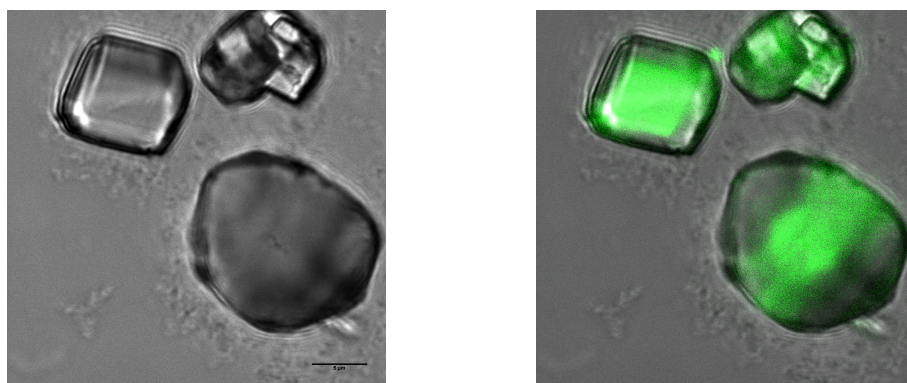

Figure S2: Confocal laser scanning microscope images of fluorescent calcite seeds grown on glass cover-slides. (left) Brightfield images of calcite seeds and (right) combination of brightfield image and fluorescent signal of incorporated fluorescent dye.
